# Supplementary material for: Sulfur containing platinum(ii) complexes with N-heterocyclic carbene ligands obtained by reactions of a hydrosulfido complex
Source: Royal Society of Chemistry journal article supplement (doi:10.1039/c2dt30597f), 2012-01-01
Supplement: c2dt30597f.pdf [file c2dt30597f.pdf]

## **Supplementary Information**

### **Sulfur containing platinum(II) complexes with *N*-heterocyclic carbene ligands obtained by reactions of a hydrosulfido complex**

**Yuri Maeda,<sup>a</sup> Hideki Hashimoto<sup>b,c,d</sup> and Takanori Nishioka<sup>\*a,c</sup>**

<sup>a</sup> *Department of Chemistry, Graduate School of Science, Osaka City University, 3-3-138 Sugimoto, Sumiyoshi-ku, Osaka 558-8585 Japan. Fax & Tel: 81 6 6605 2569; E-mail: nishioka@sci.osaka-cu.ac.jp*

<sup>b</sup> *Department of Physics, Graduate School of Science, Osaka City University*

<sup>c</sup> *CREST, Japan Science and Technology Agency, 4-1-8 Honcho Kawaguchi, Saitama 332-0012 Japan*

<sup>d</sup> *The OCU Advanced Research Institute for Natural Science and Technology (OCARINA), Osaka City University*

**Table S1** Optimised atomic coordinates of  $C_{3h}$ -isomer of  $[5]^{2+}$  obtained from DFT calculations

| Number | Atom | Coordinates (Å) |           |           |
|--------|------|-----------------|-----------|-----------|
|        |      | x               | y         | z         |
| 1      | Pt   | 0.060737        | 1.894589  | -0.004828 |
| 2      | C    | 0.259037        | 3.294587  | 1.428528  |
| 3      | C    | 0.082007        | 3.381159  | -1.399033 |
| 4      | S    | -0.007502       | -0.015188 | -1.546782 |
| 5      | S    | -0.001498       | -0.012186 | 1.520980  |
| 6      | Pt   | -1.692643       | -0.903434 | 0.000254  |
| 7      | Pt   | 1.623282        | -1.012281 | -0.003899 |
| 8      | N    | 1.335373        | 4.126651  | 1.480201  |
| 9      | N    | -0.516531       | 3.663022  | 2.478188  |
| 10     | N    | -0.834960       | 3.560813  | -2.392494 |
| 11     | N    | 0.932257        | 4.448409  | -1.530895 |
| 12     | C    | -3.011176       | -1.426001 | 1.432008  |
| 13     | C    | -2.995138       | -1.623721 | -1.391538 |
| 14     | C    | 2.909965        | -1.760791 | -1.397153 |
| 15     | C    | 2.758915        | -1.856044 | 1.430131  |
| 16     | C    | 2.420487        | 4.042055  | 0.510381  |
| 17     | C    | 1.234445        | 5.009105  | 2.549225  |
| 18     | C    | -2.035600       | 2.754071  | -2.607371 |
| 19     | C    | -0.566066       | 4.705187  | -3.126735 |
| 20     | C    | 2.150451        | 4.803745  | -0.783458 |
| 21     | C    | 0.542265        | 5.262798  | -2.590846 |
| 22     | C    | -1.801763       | 3.065431  | 2.832285  |
| 23     | C    | 0.068770        | 4.714533  | 3.176331  |
| 24     | N    | -4.262737       | -0.892024 | 1.481385  |
| 25     | N    | -2.958001       | -2.286623 | 2.477743  |
| 26     | N    | -4.342776       | -1.411035 | -1.523175 |
| 27     | N    | -2.699681       | -2.516970 | -2.378986 |
| 28     | N    | 3.517901        | -1.046066 | -2.387339 |
| 29     | C    | 3.385332        | 0.393283  | -2.609740 |
| 30     | N    | 3.432266        | -3.021540 | -1.525193 |
| 31     | N    | 3.464225        | -1.353225 | 2.472845  |
| 32     | N    | 2.967210        | -3.200640 | 1.483161  |
| 33     | C    | 3.568714        | 0.061910  | 2.819458  |
| 34     | C    | -4.714837       | 0.096566  | 0.509694  |
| 35     | C    | -5.244608       | -0.509168 | -0.787010 |
| 36     | C    | 4.389795        | -1.837582 | -3.118133 |
| 37     | C    | -4.987870       | -1.415948 | 2.544994  |
| 38     | C    | 4.109541        | -2.372088 | 3.166720  |
| 39     | C    | -4.860264       | -2.159867 | -2.576797 |
| 40     | C    | -1.402058       | -3.155078 | -2.596991 |
| 41     | C    | -3.829046       | -2.852522 | -3.109203 |
| 42     | C    | -1.814944       | -3.127771 | 2.823277  |
| 43     | C    | -4.164512       | -2.293122 | 3.170924  |
| 44     | C    | 2.356785        | -4.110598 | 0.521175  |
| 45     | C    | 3.799091        | -3.536448 | 2.544417  |
| 46     | C    | 3.146825        | -4.256470 | -0.775624 |
| 47     | C    | 4.337316        | -3.076934 | -2.581718 |
| 48     | H    | 2.601931        | 2.984536  | 0.309888  |
| 49     | H    | -1.825136       | 1.718146  | -2.352429 |
| 50     | H    | -1.908947       | 2.132836  | 2.280839  |
| 51     | H    | 2.353333        | 0.693024  | -2.442297 |
| 52     | H    | -2.857528       | 3.129853  | -1.990710 |
| 53     | H    | 2.782221        | 0.601876  | 2.294776  |

|    |   |           |           |           |
|----|---|-----------|-----------|-----------|
| 54 | H | -3.877682 | 0.768346  | 0.312299  |
| 55 | H | -2.617727 | 3.747974  | 2.578478  |
| 56 | H | 4.045874  | 0.942026  | -1.932364 |
| 57 | H | 3.015722  | 4.661868  | -1.441360 |
| 58 | H | 3.321955  | 4.468138  | 0.959443  |
| 59 | H | 2.078726  | 5.873717  | -0.564110 |
| 60 | H | -2.315247 | 2.821859  | -3.660197 |
| 61 | H | -1.823472 | 2.857124  | 3.904104  |
| 62 | H | -0.608881 | -2.446756 | -2.369459 |
| 63 | H | 4.549080  | 0.450833  | 2.529884  |
| 64 | H | -0.952325 | -2.782221 | 2.255996  |
| 65 | H | 3.667597  | 0.610051  | -3.641274 |
| 66 | H | 1.992431  | 5.742510  | 2.775565  |
| 67 | H | -1.183773 | 5.017840  | -3.953623 |
| 68 | H | 1.091634  | 6.148902  | -2.867306 |
| 69 | H | -0.388226 | 5.147560  | 4.052140  |
| 70 | H | 1.347799  | -3.745906 | 0.321552  |
| 71 | H | -5.526941 | 0.676629  | 0.956721  |
| 72 | H | 3.435601  | 0.182592  | 3.896569  |
| 73 | H | -5.527785 | 0.317220  | -1.449370 |
| 74 | H | -1.304821 | -4.039354 | -1.960391 |
| 75 | H | -2.028716 | -4.172439 | 2.580492  |
| 76 | H | -1.335538 | -3.455982 | -3.643929 |
| 77 | H | -6.152056 | -1.083070 | -0.574558 |
| 78 | H | -1.606372 | -3.039765 | 3.891698  |
| 79 | H | 4.966150  | -1.449876 | -3.943041 |
| 80 | H | 2.593766  | -4.941820 | -1.428441 |
| 81 | H | -5.998775 | -1.113388 | 2.769062  |
| 82 | H | 2.283445  | -5.102305 | 0.976068  |
| 83 | H | 4.718836  | -2.178931 | 4.035519  |
| 84 | H | -5.902191 | -2.120153 | -2.852834 |
| 85 | H | -4.322781 | -2.907946 | 4.042883  |
| 86 | H | -3.797449 | -3.549592 | -3.931477 |
| 87 | H | 4.115038  | -4.719552 | -0.560945 |
| 88 | H | 4.845774  | -3.987858 | -2.855660 |
| 89 | H | 4.079193  | -4.553828 | 2.768255  |

**Table S2** Orbital energies and kinetic energies (alpha) for  $C_{3h}$  isomer of  $[5]^{2+}$  obtained from DFT calculations

|     |        | orbital energies | kinetic energies |
|-----|--------|------------------|------------------|
| 191 | (A)--O | -0.38122         | 1.98704          |
| 192 | (A)--O | -0.37073         | 1.95085          |
| 193 | (A)--O | -0.36580         | 1.97617          |
| 194 | (A)--O | -0.36022         | 2.09940          |
| 195 | (A)--O | -0.35991         | 2.09898          |
| 196 | (A)--V | -0.17363         | 2.12901          |
| 197 | (A)--V | -0.17070         | 1.30744          |
| 198 | (A)--V | -0.17016         | 1.31593          |
| 199 | (A)--V | -0.16071         | 2.48837          |
| 200 | (A)--V | -0.16018         | 2.50050          |

**Table S3** Optimised atomic coordinates of  $C_5$  isomer of  $[5]^{2+}$  obtained from DFT calculations

| Number | Atom | Coordinates (Å) |           |           |
|--------|------|-----------------|-----------|-----------|
|        |      | x               | y         | z         |
| 1      | Pt   | -1.828516       | -0.823424 | 0.024011  |
| 2      | C    | -3.229887       | -1.132836 | 1.444907  |
| 3      | C    | -3.259291       | -1.230520 | -1.370453 |
| 4      | S    | -0.039694       | -0.201134 | -1.532907 |
| 5      | S    | -0.008132       | -0.206885 | 1.528983  |
| 6      | Pt   | 1.608885        | -1.187446 | -0.027860 |
| 7      | Pt   | 0.166421        | 1.711030  | 0.009491  |
| 8      | N    | -4.340455       | -0.348448 | 1.533586  |
| 9      | N    | -3.373610       | -2.046626 | 2.436128  |
| 10     | N    | -3.155715       | -2.131514 | -2.386580 |
| 11     | N    | -4.517079       | -0.705092 | -1.514540 |
| 12     | C    | 2.922450        | -1.878220 | 1.371480  |
| 13     | C    | 2.915001        | -1.781234 | -1.447235 |
| 14     | C    | 0.270516        | 3.173449  | -1.408082 |
| 15     | C    | 0.442233        | 3.087967  | 1.452612  |
| 16     | C    | -4.593286       | 0.742344  | 0.600072  |
| 17     | C    | -5.168229       | -0.766276 | 2.569413  |
| 18     | C    | -2.003250       | -2.989777 | -2.646866 |
| 19     | C    | -4.306278       | -2.159358 | -3.158896 |
| 20     | C    | -5.240194       | 0.293359  | -0.707770 |
| 21     | C    | -5.163078       | -1.267435 | -2.613331 |
| 22     | C    | -2.437560       | -3.126807 | 2.728804  |
| 23     | C    | -4.555778       | -1.833603 | 3.138356  |
| 24     | N    | 2.631547        | -2.726954 | 2.395776  |
| 25     | C    | 1.321362        | -3.310318 | 2.668485  |
| 26     | N    | 4.261214        | -1.624493 | 1.515504  |
| 27     | N    | 2.871632        | -2.705332 | -2.437925 |
| 28     | N    | 4.161890        | -1.241007 | -1.531309 |
| 29     | C    | 1.735504        | -3.570100 | -2.735006 |
| 30     | N    | -0.603760       | 3.341379  | -2.441853 |
| 31     | C    | -1.774549       | 2.515190  | -2.727823 |
| 32     | N    | 1.169687        | 4.196708  | -1.563683 |
| 33     | N    | -0.295845       | 3.466383  | 2.526406  |
| 34     | N    | 1.550480        | 3.877422  | 1.498691  |
| 35     | C    | 3.749439        | -2.984473 | 3.173533  |
| 36     | C    | -1.597682       | 2.920448  | 2.899594  |
| 37     | C    | -0.253875       | 4.425819  | -3.230239 |
| 38     | C    | 4.074587        | -2.737555 | -3.136650 |
| 39     | C    | 0.343477        | 4.481009  | 3.231309  |
| 40     | C    | 4.622784        | -0.223843 | -0.595310 |
| 41     | C    | 4.890050        | -1.817587 | -2.565123 |
| 42     | C    | 5.171860        | -0.793855 | 0.709321  |
| 43     | C    | 4.774068        | -2.296380 | 2.622389  |
| 44     | C    | 2.613704        | 3.782209  | 0.507066  |
| 45     | C    | 1.506624        | 4.741922  | 2.586059  |
| 46     | C    | 2.342661        | 4.581599  | -0.761335 |
| 47     | C    | 0.856135        | 4.965901  | -2.681122 |
| 48     | H    | -3.645083       | 1.251034  | 0.418253  |
| 49     | H    | 0.762615        | -3.359933 | 1.735418  |
| 50     | H    | -1.422523       | -3.072011 | -1.730119 |
| 51     | H    | -1.642961       | -3.091388 | 1.985939  |
| 52     | H    | -2.037477       | 1.956444  | -1.832599 |
| 53     | H    | 0.951418        | -3.351190 | -2.012835 |

|    |   |           |           |           |
|----|---|-----------|-----------|-----------|
| 54 | H | -2.358154 | -3.976563 | -2.952088 |
| 55 | H | -1.738197 | 1.975264  | 2.378552  |
| 56 | H | -2.952302 | -4.089368 | 2.673790  |
| 57 | H | 0.772366  | -2.694905 | 3.384667  |
| 58 | H | -2.600672 | 3.167156  | -3.021773 |
| 59 | H | -5.399131 | 1.185279  | -1.324721 |
| 60 | H | -5.279107 | 1.450743  | 1.073294  |
| 61 | H | -6.224906 | -0.133258 | -0.491273 |
| 62 | H | -1.377729 | -2.560423 | -3.432786 |
| 63 | H | -2.014867 | -2.997722 | 3.728451  |
| 64 | H | 1.370960  | -3.375837 | -3.746905 |
| 65 | H | -2.392804 | 3.622134  | 2.631083  |
| 66 | H | 1.460284  | -4.315921 | 3.070734  |
| 67 | H | -1.555338 | 1.809942  | -3.532549 |
| 68 | H | -6.095999 | -0.272294 | 2.812223  |
| 69 | H | -4.414524 | -2.811763 | -4.010944 |
| 70 | H | 2.032882  | -4.618565 | -2.651227 |
| 71 | H | -6.165930 | -0.987981 | -2.895753 |
| 72 | H | -4.848543 | -2.451547 | 3.972593  |
| 73 | H | 3.783566  | 0.447549  | -0.405264 |
| 74 | H | 2.761410  | 2.725234  | 0.279490  |
| 75 | H | -1.620251 | 2.744848  | 3.977154  |
| 76 | H | 3.717041  | -3.634526 | 4.033492  |
| 77 | H | -0.824392 | 4.715839  | -4.098372 |
| 78 | H | 5.505914  | 0.047223  | 1.327828  |
| 79 | H | 5.427347  | 0.345038  | -1.069663 |
| 80 | H | 4.236593  | -3.400236 | -3.972122 |
| 81 | H | 3.228539  | 4.503387  | -1.401845 |
| 82 | H | 3.532730  | 4.174921  | 0.950815  |
| 83 | H | -0.078677 | 4.914230  | 4.124303  |
| 84 | H | 6.050744  | -1.409349 | 0.491349  |
| 85 | H | 2.219790  | 5.637955  | -0.499884 |
| 86 | H | 5.812181  | -2.226821 | 2.906747  |
| 87 | H | 5.898694  | -1.520893 | -2.806457 |
| 88 | H | 1.445699  | 5.820213  | -2.974484 |
| 89 | H | 2.297341  | 5.440679  | 2.809794  |

**Table S4** Orbital energies and kinetic energies (alpha) for  $C_5$  isomer of  $[5]^{2+}$  obtained from DFT calculations

|     |        | orbital energies | kinetic energies |
|-----|--------|------------------|------------------|
| 191 | (A)--O | -0.37862         | 1.94337          |
| 192 | (A)--O | -0.37070         | 1.99316          |
| 193 | (A)--O | -0.36591         | 1.96156          |
| 194 | (A)--O | -0.36122         | 2.08077          |
| 195 | (A)--O | -0.35737         | 2.07792          |
| 196 | (A)--V | -0.17388         | 1.26215          |
| 197 | (A)--V | -0.17270         | 2.11448          |
| 198 | (A)--V | -0.16766         | 1.38777          |
| 199 | (A)--V | -0.16277         | 2.49602          |
| 200 | (A)--V | -0.15355         | 2.57674          |

**Table S5** Dipole moment (field-independent basis, Debye) of  $[5]^{2+}$  obtained from DFT calculations

|                  | x      | y      | z      | total  |
|------------------|--------|--------|--------|--------|
| $C_{3h}$ -isomer | 0.0447 | 0.1071 | 0.5376 | 0.5500 |
| $C_5$ -isomer    | 0.3469 | 1.6257 | 0.1006 | 1.6654 |

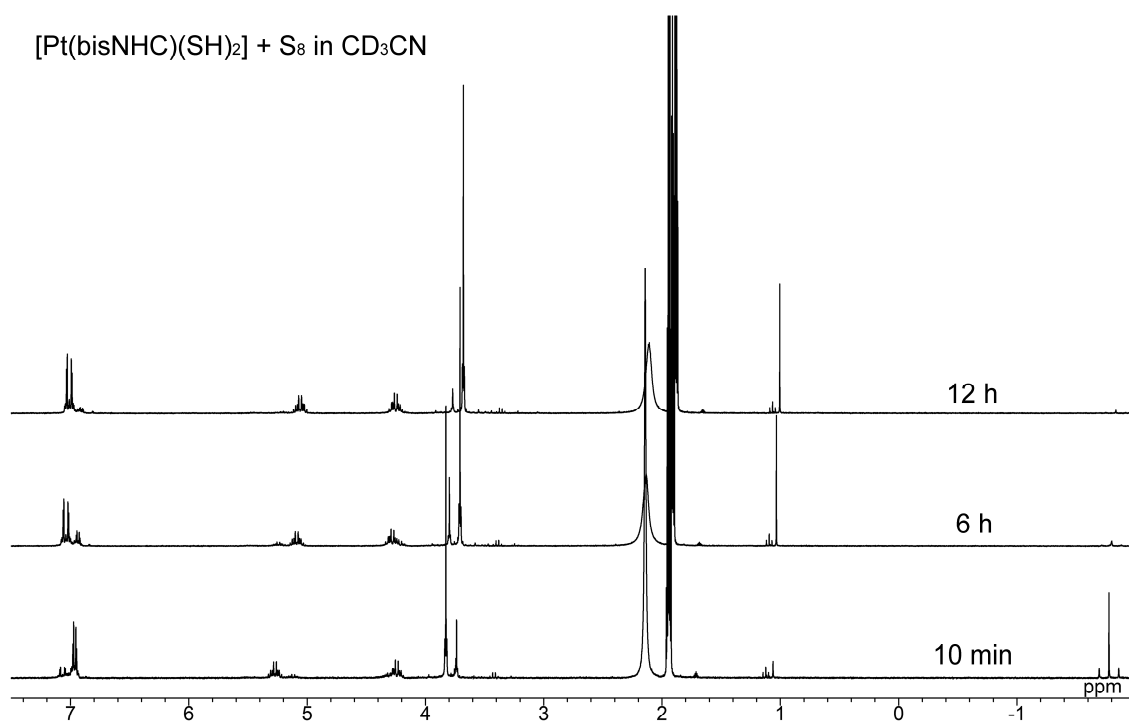

**Fig. S1** <sup>1</sup>H NMR spectra of the reaction mixture of **2** and elemental sulfur.
